# Supplementary material
Source: Research Square preprint supplement (doi:10.21203/rs.3.rs-9759949/v1)
Supplement: Supplementary file 1 [file 1908962d894df10849a94ac3.docx]

**Supplementary Table 1. Distribution of infective endocarditis and distant infectious foci**

|  | Number |
| --- | --- |
| ***S. lugdunensis* bacteremia (SLB)** |  |
| With IE  ― Prosthetic valve endocarditis only  ― Prosthetic valve endocarditis with pulmonary septic emboli  ― Native valve endocarditis only  Without IE  ― Osteomyelitis with abscess  ― Osteomyelitis with graft infection  ― Osteomyelitis with pulmonary septic emboli  ― Intra-abdominal abscess  ― Pulmonary septic emboli | 4  2  1  1  1  1  1  1 |
| **Other coagulase-negative staphylococci (CoNS) bacteremia** |  |
| With IE  ―Prosthetic valve endocarditis with surgical site infection  Without IE  ―Osteomyelitis with epidural abscess and psoas abscess | 1  1 |
| ***S. aureus* bacteremia** |  |
| With IE  ― Prosthetic valve endocarditis with cerebral infarction  ― Native valve endocarditis with osteomyelitis  ― Native valve endocarditis with abscess  ― Native valve endocarditis with osteomyelitis and abscess  ― Native valve endocarditis only  Without IE  ― Osteomyelitis only  ― Osteomyelitis with abscess  ― Abscess only  ― Abscess with cerebral infarction  ― Infected aneurysm  ― Osteomyelitis with Cellulitis  ― Prosthetic joint infection  ― Septic thrombophlebitis | 2  2  1  1  1  8  6  3  1  1  1  1  1 |

Abbreviations: IE, infective endocarditis.

**Supplementary Table 2. Association between infectious diseases consultation and 30-day mortality**

|  | Mortality **with** ID consultation | Mortality **without** ID consultation | *p* value |
| --- | --- | --- | --- |
| *S. lugdunensis* bacteremia, N (%) | 0/10 (0%) | 1/22 (4.5%) | 1 |
| Other CoNS bacteremia, N (%) | 1/15 (6.7%) | 2/32 (6.3%) | 1 |
| *S. aureus* bacteremia, N (%) | 1/29 (3.4%) | 9/76 (11.8%) | 0.28 |
| Overall, N (%) | 2/54 (3.7%) | 12/130 (9.2%) | 0.24 |

Abbreviations: ID consultation, Infectious diseases consultation. CoNS bacteremia, coagulase-negative staphylococci bacteremia.
