# Supplementary material
Source: Research Square preprint supplement (doi:10.21203/rs.3.rs-9759949/v1)
Supplement: Supplementary file 2 [file b004acf7a532f7e42abd8633.docx]

**Table 1. Baseline characteristics of patients with *Staphylococcus lugdunensis* bacteremia (SLB), *Staphylococcus aureus* bacteremia (SAB), and other coagulase-negative staphylococcal (CoNS) bacteremia**

|  | SLB  (N=32) | | Other CoNS*  (N=47) | | SAB  (N=105) | *p* value  among three groups | | *p* value  SLB—CoNS | *p* value  SLB—SAB |
| --- | --- | --- | --- | --- | --- | --- | --- | --- | --- |
| **Age, years (Median [IQR])** | 71 [56–81] | | 72 [60–77] | | 78 [66–86] | 0.03 | | 0.91 | 0.07 |
| **Sex, male, N (%)** | 19 (59.4%) | | 30 (63.8%) | | 71 (67.6%) | 0.65 | | — | — |
| **In-hospital onset, N (%)** | 11 (34.4%) | | 38 (80.9%) | | 54 (51.4%) | <0.01 | | <0.01 | 0.11 |
| **Background condition, N (%)**  **―** Malignancy  **―** Diabetes mellitus  **―** Immunosuppressive therapy  **―** Chemotherapy  **―** Valve disease  **―** Chronic kidney disease  **―** Hemodialysis | 11 (34.4%)  6 (18.8%)  3 (9.4%)  6 (18.8%)  6 (18.8%)  4 (12.5%) | | 22 (46.8%)  11 (23.4%)  14 (29.8%)  11 (23.4%)  9 (19.1%)  6 (12.8%) | | 26 (24.8%)  26 (24.8%)  12 (11.4%)  12 (11.4%)  31 (29.5%)  12 (11.4%) | 0.03  0.84  0.01  0.15  0.28  0.95 | | 0.35  —  0.05  —  —  — | 0.36  —  1  —  —  — |
| 1 (3.1%) | | 3 (6.4%) | | 4 (3.8%) | 0.79 | | — | — |
| **Artifact, N (%)** | 6 (18.8%)  11 (34.4%)  7 (21.9%)  9 (28.1%)  0 (0%) | | 32 (68.1%)  33 (70.2%)  2 (4.3%)  1 (2.1%)  3 (6.4%) | | 28 (26.7%)  37 (35.2%)  2 (1.9%)  8 (7.6%)  3 (2.9%) | <0.01  <0.01  <0.01  <0.01  0.38 | |  |  |
| **―** CV catheter  **―** Peripheral catheter  **―** Prosthetic valve  ― Other intra cardiac device  ― Orthopedic device | <0.01  <0.01  0.03  <0.01  — | 0.49  1  <0.01  <0.01  — |
| **Blood culture**  ― submit, (Median [IQR])  ― positive, (Median [IQR])  ― Follow blood culture, N (%)  ― Methicillin resistant, N (%) | 2 [2–2]  2 [1–2]  23 (71.9%)  10 (31.3%) | 2 [2–2]  2 [2–2]  33 (70.2%)  29 (61.7%) | | 2 [2–2]  2 [1–2]  89 (84.8%)  29 (27.6%) | | | ―  ―  0.07  <0.01 | —  —  —  0.01 | —  —  —  0.82 |

Abbreviations: CV catheter, central venous catheter. IQR, interquartile range.

＊Other CNS comprised *Staphylococcus epidermidis* (n = 34) and other coagulase-negative staphylococci (n = 13).

**Table 2. Diagnostic evaluation and distant infectious foci**

|  | SLB  (N=32) | Other CoNS  (N=47) | SAB  (N=105) | *p* value  among three groups | *p* value  SLB —CoNS | *p* value  SLB —SAB |
| --- | --- | --- | --- | --- | --- | --- |
| **Diagnostic evaluation, N (%)**  **―** CT or MRI  **―** Transthoracic echocardiography (TTE)  **―** Transesophageal echocardiography (TEE) | 25 (78.1%)  21 (65.6%)  7 (21.9%) | 32 (68.1%)  29 (61.7%)  1 (2.1%) | 81 (77.1%)  76 (72.4%)  14 (13.3%) | 0.46  0.39  0.01 | —  —  <0.01 | —  —  0.27 |
| **Complications, N (%)**  ― Distant infectious foci* only  ― Infective endocarditis only  ― Both distant infectious foci and infective endocarditis  ― Composite endpoint: infective endocarditis or distant infectious foci | 5 (15.6%)  5 (15.6%)  2 (6.3%)  12 (37.5%) | 1 (2.1%)  0 (0%)  1 (2.1%)  2 (4.2%) | 22 (21.0%)  1 (1.0%)  6 (5.7%)  29 (27.6%) | <0.01  <0.01  0.64  <0.01 | 0.04  <0.01  0.56  <0.01 | 0.62  <0.01  1  0.38 |

Abbreviations: CT, computed tomography. MRI, magnetic resonance imaging.

＊Distant infectious foci were defined as sites of infection identified by imaging studies (e.g., CT or MRI), without distinguishing between primary and hematogenous spread.

**Table 3. Clinical management and patient outcomes**

|  | SLB  (N=32) | Other CoNS  (N=47) | SAB  (N=105) | *p* value  among three groups | *p* value  SLB —CoNS | *p* value  SLB —SAB |
| --- | --- | --- | --- | --- | --- | --- |
| **Clinical management**  ― Antibiotics within 24h after blood culture positivity, N (%)  ―Duration of antibiotic therapy, days (Median [IQR])  ― Infectious diseases consultation, N (%) | 32 (100%)  14 [9–57]  10 (31.3%) | 41 (87.2%)  14 [8–16]  15 (12.5%) | 104 (99.0%)  20 [14–40]  29 (25.7%) | <0.01  <0.01  0.86 | 0.08  0.08  — | 1  0.44  — |
| **Clinical outcome**  ― 7-day all-cause mortality, N (%)  ― 30-day all-cause mortality, N (%) | 0 (0%)  1 (3.1%) | 1 (2.1%)  3 (6.4%) | 4 (3.8%)  10 (9.5%) | 0.50  0.45 | 0.41  0.51 | 0.27  0.24 |

Abbreviations: IQR, interquartile range.
